# Supplementary material for: Exploring amyotrophic lateral sclerosis patients’ experiences of psychological distress during the disease course in China: a qualitative study
Source: HighWire-hosted journal article supplement (doi:10.1136/bmjopen-2023-082398), 2024-06-01
Supplement: bmjopen-2023-082398supp002_data_supplement.pdf [file bmjopen-2023-082398supp002_data_supplement.pdf]

Supplement 2

Table 1 Demographic information of the participants (n=22)

| Participants | Age | Gender | Educational<br>level             | Marital<br>status | Current<br>work<br>status | Family<br>Caregiver(s) | Time since<br>symptom<br>onset<br>(months) | Time<br>since<br>diagnosis<br>(months) | Symptoms<br>of the<br>Disease | Site of<br>onset |
|--------------|-----|--------|----------------------------------|-------------------|---------------------------|------------------------|--------------------------------------------|----------------------------------------|-------------------------------|------------------|
| P1           | 51  | Male   | Undergraduate                    | Married           | Unemploy<br>ment          | Spouse                 | 13                                         | 10                                     | Sporadic                      | Bulbar onset     |
| P2           | 57  | Female | Junior college                   | Married           | Unemploy<br>ment          | Spouse                 | 12                                         | 11                                     | Sporadic                      | Limb onset       |
| P3           | 60  | Male   | NA                               | Married           | Retired                   | Spouse                 | 5                                          | 3                                      | Sporadic                      | Limb onset       |
| P4           | 56  | Female | Junior High<br>School            | Married           | Unemploy<br>ment          | Spouse                 | 12                                         | 9                                      | Sporadic                      | Bulbar onset     |
| P5           | 45  | Male   | Undergraduate                    | Married           | On leave                  | Elders                 | 9                                          | 7                                      | Sporadic                      | Limb onset       |
| P6           | 54  | Male   | Junior college                   | Married           | Unemploy<br>ment          | Son                    | 9                                          | 8                                      | Sporadic                      | Limb onset       |
| P7           | 44  | Female | Technical<br>Secondary<br>School | Married           | On leave                  | Aunt                   | 6                                          | 4                                      | Sporadic                      | Limb onset       |
| P8           | 35  | Male   | Undergraduate                    | Married           | On leave                  | Father                 | 12                                         | 10                                     | Familial                      | Limb onset       |
| P9           | 47  | Male   | NA                               | Married           | On leave                  | Spouse                 | 53                                         | 47                                     | Sporadic                      | Bulbar onset     |
| P10          | 45  | Male   | Undergraduate                    | Married           | On leave                  | Brother                | 17                                         | 14                                     | Sporadic                      | Limb onset       |
| P11          | 54  | Male   | Junior college                   | Married           | Unemploy<br>ment          | None                   | 6                                          | 3                                      | Sporadic                      | Limb onset       |
| P12          | 35  | Female | Undergraduate                    | Married           | On leave                  | Spouse                 | 9                                          | 8                                      | Sporadic                      | Limb onset       |
| P13          | 57  | Male   | Junior college                   | Married           | Unemploy<br>ment          | None                   | 10                                         | 5                                      | Sporadic                      | Limb onset       |
| P14          | 49  | Male   | NA                               | Married           | On leave                  | Aunt                   | 5                                          | 2                                      | Sporadic                      | Limb onset       |
| P15          | 47  | Female | Technical                        | Married           | On leave                  | Spouse                 | 8                                          | 3                                      | Sporadic                      | Limb onset       |

|           |    |        |                |         |          |         |    |    |          |              |
|-----------|----|--------|----------------|---------|----------|---------|----|----|----------|--------------|
| Secondary |    |        |                |         |          |         |    |    |          |              |
| School    |    |        |                |         |          |         |    |    |          |              |
| P16       | 33 | Male   | Junior college | Married | On leave | Mother  | 17 | 14 | Sporadic | Limb onset   |
| P17       | 55 | Female | NA             | Married | Retired  | Spouse  | 6  | 2  | Familial | Limb onset   |
| P18       | 49 | Male   | Junior college | Married | On leave | Brother | 25 | 20 | Sporadic | Limb onset   |
| P19       | 53 | Male   | primary school | Married | Unemploy | NA      | 5  | 1  | Sporadic | Limb onset   |
| ment      |    |        |                |         |          |         |    |    |          |              |
| P20       | 44 | Male   | Technical      | Married | Unemploy | Spouse  | 6  | 3  | Sporadic | Limb onset   |
| Secondary |    |        |                |         |          |         |    |    |          |              |
| ment      |    |        |                |         |          |         |    |    |          |              |
| School    |    |        |                |         |          |         |    |    |          |              |
| P21       | 30 | Female | Undergraduate  | Married | Unemploy | Spouse  | 27 | 23 | Sporadic | Bulbar onset |
| ment      |    |        |                |         |          |         |    |    |          |              |
| P22       | 42 | Female | Undergraduate  | Single  | Unemploy | Niece   | 24 | 18 | Sporadic | Limb onset   |
| ment      |    |        |                |         |          |         |    |    |          |              |
